1                   **Textile waste and microplastic induce activity and**  
2                   **development of unique hydrocarbon-degrading marine**  
3                   **bacterial communities**

4  
5 Elsa B. Girard<sup>1</sup>, Melanie Kaliwoda<sup>2</sup>, Wolfgang W. Schmahl<sup>1,2,3</sup>, Gert Wörheide<sup>1,3,4</sup> and  
6 William D. Orsi<sup>1,3\*</sup>

7  
8 <sup>1</sup> Department of Earth and Environmental Sciences, Ludwig-Maximilians-Universität München,  
9 80333 Munich, Germany

10 <sup>2</sup> SNSB - Mineralogische Staatssammlung München, 80333 München, Germany

11 <sup>3</sup> GeoBio-Center<sup>LMU</sup>, Ludwig-Maximilians-Universität München, 80333 Munich, Germany

12 <sup>4</sup> SNSB - Bayerische Staatssammlung für Paläontologie und Geologie, 80333 Munich, Germany

13 \*Corresponding author (e-mail: [w.orsi@lrz.uni-muenchen.de](mailto:w.orsi@lrz.uni-muenchen.de))  
14  
15  
16  
17

18 **KEYWORDS**

19 Microplastic, Fiber, Hydrocarbon-degrading bacteria, Microbial community, Pollution  
20  
21

## 22 **ABSTRACT**

23 Biofilm-forming microbial communities on plastics and textile fibers are of growing interest since  
24 they have potential to contribute to disease outbreaks and material biodegradability in the  
25 environment. Knowledge on microbial colonization of pollutants in the marine realm is expanding,  
26 but metabolic responses during substrate colonization remains poorly understood. Here, we assess  
27 the metabolic response in marine microbial communities to three different micropollutants, virgin  
28 high-density polyethylene (HDPE) microbeads, polysorbate-20 (Tween), and textile fibers.  
29 Intertidal textile fibers, mainly cotton, virgin HDPE, and Tween induced variable levels of  
30 microbial growth, respiration, and community assembly in controlled microcosm experiments.  
31 RAMAN characterization of the chemical composition of the textile waste fibers and high-  
32 throughput DNA sequencing data shows how the increased metabolic stimulation and  
33 biodegradation is translated into selection processes ultimately manifested in different  
34 communities colonizing the different micropollutant substrates. The composition of the bacterial  
35 communities colonizing the substrates were significantly altered by micropollutant substrate type  
36 and light conditions. Bacterial taxa, closely related to the well-known hydrocarbonoclastic bacteria  
37 *Kordiimonas* spp. and *Alcanivorax* spp., were enriched in the presence of textile-waste. The  
38 findings demonstrate an increased metabolic response by marine hydrocarbon-degrading bacterial  
39 taxa in the presence of microplastics and textile waste, highlighting their biodegradation potential.  
40 The metabolic stimulation by the micropollutants was increased in the presence of light, possibly  
41 due to photochemical dissolution of the plastic into smaller bioavailable compounds. Our results  
42 suggest that the development and increased activity of these unique microbial communities likely  
43 play a role in the bioremediation of the relatively long lived textile and microplastic pollutants in  
44 marine habitats.

45

## 46 **INTRODUCTION**

47 Plastics are synthetic organic polymers that are composed of long chains of monomers primarily  
48 made from petrochemical sources <sup>1</sup>. The mismanagement of waste in regions with high coastal  
49 population density has been linked to high plastic input into the ocean, resulting in an annual flow  
50 of 4.8 to 12.7 million tons per year since 2010 <sup>2</sup>. Once released in the environment, debris are

51 readily colonized by complex microbial communities<sup>3</sup>. Consequently, macro- and micro-litter  
52 may facilitate microbial dispersal throughout the marine realm. However, knowledge gaps  
53 regarding the mechanisms of microbial biodegradation of plastic and textile waste.

54 Plastic-degrading microorganisms have been studied since the 1960's. Summer studied the  
55 inhibition of microorganism growth for lasting polymers, to counter the deterioration of plastics  
56 due to mold and bacteria, because some plasticisers (chemical additives used to provide strength  
57 and flexibility), e.g., Ester-type plasticisers, are in turn a source of nutrients, which sustains  
58 microbial activity leading to natural degradation of the polymer<sup>4</sup>. More recent studies have shed  
59 some light on the diversity of microbial communities colonizing synthetic polymers. For example,  
60 Zettler *et al.* (2013) identified a highly diverse microbial community settled on plastic debris,  
61 termed as the "plastisphere", unraveling polymer-dependent communities<sup>5</sup>. Moreover, its species  
62 richness appears to be more important than the microbial community in seawater samples for a  
63 given surface<sup>3,5</sup>. The colonization of plastic debris by bacteria is hypothesized as a two-step  
64 settlement: primary colonization by  $\alpha$ - and  $\gamma$ -proteobacteria, and subsequent secondary  
65 colonization by Bacteroidetes<sup>6,7</sup>.

66 Bioremediation of plastic pollution can be aided by heterotrophic bacteria<sup>8</sup>. These  
67 microorganisms may survive by extracting the carbon from plastic particles, via hydrolysis of the  
68 hydrocarbon polymer<sup>7,8</sup>. Recent studies have identified a few bacterial species able to deteriorate  
69 plastics, for example, *Ideonella sakainesis*, which is a betaproteobacterium actively degrading  
70 polyethylene (PE)<sup>9</sup>. The plastisphere also harbours a variety of potential pathogens, i.e., harmful  
71 microorganisms to animals, such as *Vibrio* spp.<sup>3,5,6</sup>. Indeed, Lamb *et al.* observed the transfer of  
72 harmful bacteria from plastic litter to reef-building corals, causing three diseases (skeletal eroding  
73 band disease, white syndromes and black band disease), which led to coral mortality<sup>10</sup>. Such  
74 observation highlights the need for reducing and taking action on plastic pollution in the  
75 environment.

76 Microparticles of textile waste (i.e., synthetic and natural fibers) enter the ocean due to  
77 atmospheric deposition and poor wastewater incubation plant filtration systems allowing the  
78 leakage of fibers to the aquatic environment, making it one of the most abundant and recorded  
79 micropollutants at sea<sup>11,12</sup>. Thus, this study aims to assess the potential for bioremediation of  
80 microplastics and textile waste by marine microbial communities in a controlled microcosm  
81 experiments.

82 The main questions addressed here are whether specific micropollutant-associated microbial  
83 communities develop in the presence of high-density polyethylene (HDPE) microbeads and textile  
84 fibers as sole source of carbon, and how these substrates influence their metabolic state.  
85 Furthermore, we investigated whether light has an impact on the development and metabolism of  
86 these communities. We hypothesized that hydrocarbon-degrading microbes can use microplastics  
87 and textile waste as the sole carbon source, and that different types of microplastics will select for  
88 unique communities with different levels of activity. Because light also plays a role in the abiotic  
89 degradation of organic matter in aquatic environments<sup>13</sup>, we hypothesized that exposure to light  
90 may also improve the ability of the bacteria to utilize carbon from plastic polymers as a growth  
91 substrate due to its photochemical dissolution. The results contribute to our understanding of the  
92 formation and development of plastics and textile-waste-associated microbes and their potential  
93 role in bioremediation of these widespread environmental micropollutants.

94  
95

## 96 MATERIAL AND METHODS

97

98 **Experimental setup and sampling.** A total of 15 mL of aquarium seawater containing  
99 microbial communities were incubated in 20 mL glass petri dishes for 108 h at room temperature,  
100 which received either no micropollutants (control), polysorbate (Tween) 20, Tween 20 and HDPE  
101 microbeads, or textile fibers (Tab. 1, Fig. 1). Tween 20 was used as a control since it is used as an  
102 emulsifier for the HDPE microbeads and thus serves to test whether the microbes respond only to  
103 the Tween or also are effected by the HDPE itself. The artificial seawater microbial community  
104 comes from an aquarium (642 L) built of imported live rocks, which hosts many reefs organisms,  
105 such as hexacorals, octacorals, gorgonians, sea anemones (*Aiptasia* sp.), marine sponges  
106 (*Lendenfeldia chondrodes*, *Tethya wilhelma*), marco-algae (*Chaetomorpha linum*) and  
107 cyanobacteria, mussels (*Mytilus edulis*) and benthic foraminifera (*Elphidium crispum*) (Fig. 1A).  
108 For each of these incubations, one set was placed under LEDs (Mitras LX6200 HV; light spectrum  
109 of 380 nm to 700 nm) with a 12/24 h light cycle (referred to as “light”) and the other one placed  
110 inside a cardboard box covered with aluminium foil to block incoming light (referred to as “dark”)  
111 (Fig. 1). Each incubation set consists of twelve glass petri dishes sealed with parafilm containing  
112 a submerged oxygen sensor spot (PreSens Precision Sensing): three controls and nine incubations

113 (Fig. 1B). The oxygen sensor spot was positioned at the bottom of the petri dish to measure the  
114 minimal concentration of O<sub>2</sub>, that could be dissolved into the bottom water of the petri dish after  
115 diffusion from the overlying headspace.

116 The oxygen concentration in each incubation was closely monitored over the first 48 h of the  
117 experiment using a Stand-alone Fiber Optic Oxygen Meter (PreSens Fibox 4) interacting with the  
118 oxygen sensor spots. At the beginning of the experiment, four samples of 15 mL were collected  
119 from the aquarium to assess the initial microbial community (T<sub>0</sub>; referred to as “aquarium”). All  
120 incubations and aquarium samples were processed through 4 or 15 mL Amicon® Ultra Centrifugal  
121 Filters (4000 rpm, RCF 3399 \*g, 10 min. at 20 °C) to concentrate microbes and associated particles  
122 depending on the incubation. The concentrated supernatant was equally transferred in two Lysing  
123 matrix E tubes for every incubation.

124

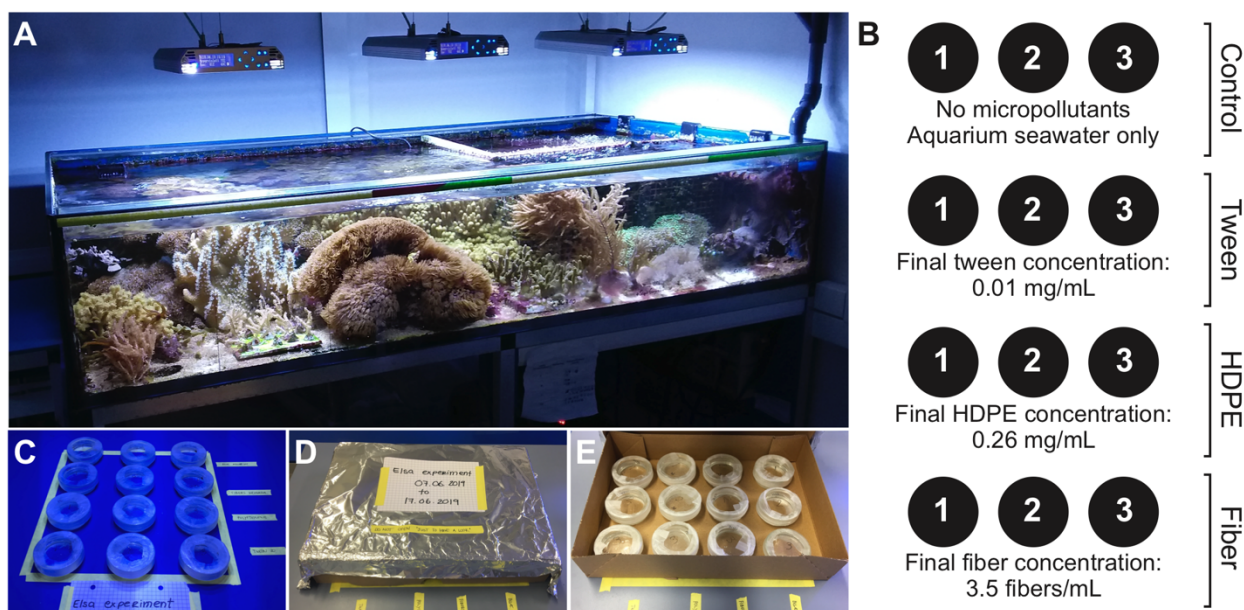

125

126 **Figure 1.** Experimental setup. A) Aquarium hosting a small reef ecosystem from which 15 mL was transferred  
127 into each incubation petri dish. B) incubation set of twelve glass petri dishes and associated incubations. C)  
128 Experimental display under artificial sunlight. D) and E) experimental display with limited access to light.

129

130

131

132

**Incubation      Description**

|               |                                                                                                                                                                                                                                                                                                                                             |
|---------------|---------------------------------------------------------------------------------------------------------------------------------------------------------------------------------------------------------------------------------------------------------------------------------------------------------------------------------------------|
| Control       | Control petri dishes containing only 15 mL of artificial seawater, with no micropollutants.                                                                                                                                                                                                                                                 |
| Tween         | 0.1% Tween 20 solution produced following the solubilisation protocol of Cospheric LLC ( <a href="https://www.cospheric.com/">https://www.cospheric.com/</a> ).<br><br>150 $\mu$ L of tween solution was added to 15 mL of artificial seawater.<br><br>Final tween concentration: 0.01 mg/mL.                                               |
| HDPE          | Virgin HDPE microbeads (1-4 $\mu$ m; 0.96 g/cm <sup>3</sup> ) solubilized in 0.1% Tween 20 solution (final concentration of 2.6% solid solution of HDPE).<br><br>150 $\mu$ L of HDPE solution was added to 15 mL of artificial seawater.<br><br>Final HDPE concentration: 0.26 mg/mL.                                                       |
| Textile fiber | Ca. 500 textile fibers were collected from intertidal sediment at Coral Eye Resort (Bangka Island, North Sulawesi, Indonesia). Fibers were washed twice in Ethanol >99%.<br><br>150 $\mu$ L of Milli-Q H <sub>2</sub> O containing 50-60 fibers was added to 15 mL of artificial seawater.<br><br>Final fiber concentration: 3.5 fibers/mL. |

133

134 **Table 1.** Description of each incubation type, equally exposed to light and dark conditions.

135

136 **Quantitative PCR.** The DNA was extracted as in Pichler *et al.* (2018), using 1 mL of a C1  
137 extraction buffer<sup>14</sup>. To lyse cells, the samples were subsequently heated at 99 °C for 2 min, frozen  
138 at -20 °C for 1 h, thawed at room temperature, and heated again at 99 °C for 2 min. After  
139 homogenization and centrifugation, the samples were concentrated a second time through Amicon  
140 filters, down to a final volume of ca. 100  $\mu$ L. The supernatant was purified following the DNeasy®  
141 PowerClean® Pro Cleanup Kit (Qiagen, Hilden, Germany). To assess the number of 16S copies  
142 at the end of the experiment, all samples were amplified using quantitative PCR (qPCR; Bio-Rad  
143 CFX connect™ Real-Time System). Every reaction contained 4 $\mu$ L of DNA template, 10  $\mu$ L of

144 Supermix, 5.2  $\mu\text{L}$  H<sub>2</sub>O, and 0.4  $\mu\text{L}$  of forward and reverse primer, and were subject to the following  
145 PCR program: denaturation at 95 °C for 3 min, and 40 amplification cycles (denaturation at 95 °C  
146 for 10 s, annealing 55 °C for 30 s). All qPCR reactions were set up using an Eppendorf EpMotion  
147 pipetting robot that has <5% technical variation and results in qPCR reaction efficiencies (standard  
148 curves) having >90%<sup>15</sup>.

149

150 **16S amplicon library preparation.** To assess the diversity of the microbial community in the  
151 experimental samples, the V4 hypervariable region 16S rRNA gene (ca. 250 base pairs) was  
152 amplified with a set of primers (515F 5'-TATGGTAATTGTGTGCCAGCMGCCGCGGTAA-3'  
153 and 806R 5'-AGTCAGTCAGCCGGACTACHVGGGTWTCTAAT-3'), combined to a forward  
154 (P5) and reverse (P7) adaptor, and unique dual indices for every sample<sup>14</sup>. The preparation of the  
155 samples for the polymerase chain reaction (PCR) was done according to Pichler *et al.* (2018). In  
156 short, 4  $\mu\text{L}$  of extracted DNA was mixed to 5  $\mu\text{L}$  5x PCR buffer, 1  $\mu\text{L}$  50 mM dNTP, 1  $\mu\text{L}$  forward  
157 515F and 1  $\mu\text{L}$  reverse 806R primers, 9.9  $\mu\text{L}$  H<sub>2</sub>O, 3  $\mu\text{L}$  MgCl<sub>2</sub> and 0.1  $\mu\text{L}$  Taq DNA polymerase,  
158 for a total volume of 25  $\mu\text{L}$  for each sample. The amplification took place under specific PCR  
159 settings: denaturation at 95 °C for 3 min, 35 amplification cycles (denaturation at 95 °C for 10 s,  
160 annealing 55 °C for 30 s, elongation 72 °C for 1 min), and elongation at 72 °C for 5 min to ensure  
161 polymerization of all amplified DNA strands. PCR products were run through a 1.5% (w/v)  
162 agarose gel, and DNA strands were subsequently extracted using the QIAquick® Gel Extraction  
163 Kit (Qiagen, Hilden, Germany). The DNA concentration was quantified using the fluorometer  
164 QuBit 2.0 (Life Technologies, Grand Island, USA) and its associated dsDNA high-sensitivity  
165 assay kit. As preparation for 16S amplicon sequencing, all samples were pooled together by adding  
166 5  $\mu\text{L}$  of every sample at a DNA concentration of 1 nM.

167

168 **16S amplicon sequencing.** A high diversity library was added to the 16S amplicon pool to  
169 enhance the recognition of the 16S sequences by the Illumina MiniSeq. The DNA was denatured  
170 by adding of 0.1 nM NaOH for a short period of 5 min, which was then directly neutralized with  
171 a tris-HCl buffer (pH 7) to avoid hydrolyzation of the DNA. To not overload the flow cell, a two-  
172 step dilution was performed on the 16S pool for a final DNA concentration of 1.8 pM, resulting in  
173 a final volume of 500  $\mu\text{L}$  MiniSeq solution. Four additional sequencing primers after<sup>14</sup> were added  
174 to successfully undergo the dual-index barcoding with the MiniSeq. Finally, the prepared 1.8 pM

175 solution of 16S, transcriptomes, and the four sequencing primers was loaded into the reagent  
176 cartridge.

177

178 **Data analysis.** To transform the demultiplexed sequences from Illumina MiniSeq into an OTU  
179 table, the raw data was manipulated using USEARCH v11.0 (<https://drive5.com/usearch>)<sup>16</sup>  
180 following the method developed by Pichler and colleagues (2018). Most similar sequences sharing  
181 at least 97% of bases were grouped, and associated to an operational taxonomic unit (OTU). Each  
182 OTU was classified within the Taxonomic Classification System using MacQiime v1.9.1  
183 (<http://qiime.org/>). To keep a control on the analyzed data, OTUs of less than 10 reads to all  
184 samples were discarded. Statistical analyses were computed in R v3.3.3<sup>17</sup>. For phylogenetic  
185 reconstruction, most abundant selected OTUs were identified using blastn (BLAST®,  
186 <https://blast.ncbi.nlm.nih.gov/>). Sequences were aligned in MAFFT v7.427 (<https://mafft.cbrc.jp/alignment/software/>). The phylogenetic tree was inferred using Seaview v4.7<sup>18</sup> under PhyML  
187 optimized settings (GTR model), including 100 bootstrap replicates<sup>19</sup>. All related primary data  
188 and R scripts are stored on GitHub (<https://github.com/PalMuc/PlasticsBacteria>).

190

191 **Raman spectroscopy.** Forty textile fibers were randomly subsampled and their associated  
192 spectrum obtained with a HORIBA JOBIN YVON XploRa ONE micro Raman spectrometer  
193 belonging to the Mineralogical State Collection Munich (SNSB). The used Raman spectrometer  
194 is equipped with edge filters, a Peltier cooled CCD detector and three different lasers working at  
195 532 nm (green), 638 nm (red) and 785 nm (near IR). To perform the measurements the near IR  
196 Laser (785 nm) was used, with a long working distance objective (LWD), magnification 100x  
197 (Olympus, series LMPlanFL N), resulting in a 0.9  $\mu\text{m}$  laser spot size on the sample surface. The  
198 wavelength calibration of the IR laser was performed by manual calibration with a pure Si wafer  
199 chip, the main peak intensity had values in the interval  $520\text{ cm}^{-1} \pm 1\text{ cm}^{-1}$ . The wave number  
200 reproducibility was checked several times a day providing deviation of less than  $< 0.2\text{ cm}^{-1}$ .  
201 Monthly deviation was in the range of  $1\text{ cm}^{-1}$  before calibration. The necessary power to obtain a  
202 good-quality spectrum varied between 10% and 50% (i.e., respectively 2.98 mW and 18 mW  $\pm$   
203 0.1 mW on the sample surface) depending on the type and degraded stage of the measured textile  
204 fiber. The pin-hole and the slit were respectively set at 300 and 100. Each acquisition included two  
205 accumulations with a grading of 1200 T and an integration time of 5 s over a spectral range of 100



206 to 1600  $\text{cm}^{-1}$ . The precision of determining Raman peak positions by this method is estimated to  
207 be  $\pm 1$  to  $\pm 1.5$   $\text{cm}^{-1}$ . Resulting Raman spectra were analyzed using LabSpec Spectroscopy Suite  
208 software v5.93.20, treated in R v3.3.3, manually sorted in Adobe Illustrator CS3, and compared  
209 with available spectra from published work. All related Raman spectra and R scripts are stored on  
210 GitHub (<https://github.com/PalMuc/PlasticsBacteria>).

211

212

## 213 **RESULTS & DISCUSSION**

214

215 For four days, a coral reef aquarium microbial community was incubated with Tween 20, HDPE  
216 microbeads and intertidal textile fibers in a microcosm experiment to test its potential to  
217 bioremediate widespread micropollutants. After sequencing of the V4 hypervariable region of the  
218 16S rDNA genes a total of 1,463,028 sequences were obtained, from a total of 50 samples. After  
219 the quality control on the data, all sequences were clustered in 3,884 OTUs, of which 563 (85%)  
220 could be taxonomically classified.

221

222 **Respiration and induced microbial activity.** Ten to 12 hours after the beginning of the  
223 experiment, a noticeable decrease in oxygen concentration was measured in all incubations  
224 containing micropollutants that was not observed in the control (Fig. 2A). This increased oxygen  
225 consumption in the presence of micropollutants indicates that microbial metabolism was  
226 stimulated by these pollutants, and their utilization as a carbon source for growth. It is likely that  
227 the transition between initial and final microbial communities initiated at this time in all  
228 incubations, which correlates with the theory that plastic surfaces are colonized within 24 h in the  
229 natural environment <sup>6</sup>.

230 Control, tween and HDPE incubations reached an equilibrium between oxygen consumption and  
231 production after this time, whereas microbial communities in the textile fiber incubations  
232 continued to consume oxygen at a high rate (Fig. 2A). This indicates a higher microbial activity  
233 induced by the intertidal textile fibers. These fibers were mainly pigmented with a black dye (CI.  
234 reactive black 5 or 8) and a blue dye (phthalocyanine 15 (PB15)) according to the Raman analysis  
235 <sup>20,21</sup>. Indeed, as much as 42% of the fiber spectra expressed only the fiber pigment, covering the  
236 fabric signal and preventing the identification of the polymer composition (Fig. 3). Here, only

237 cotton expressed a signal strong enough to be recognized in the Raman spectra, with characteristic  
238 Raman peaks at positions 379, 435, 953, 1091 and 1116  $\text{cm}^{-1}$  (Fig. 3). Hence, at least 44% of all  
239 fibers collected in the intertidal zone were identified as cotton, which appears to be one of the most  
240 abundant fiber materials found in the environment <sup>11,22</sup>.

241 As textile fibers were sampled directly from an intertidal sandy beach in Indonesia (see Table  
242 1), they were already exposed to high ultraviolet (UV) radiation and temperature, which are the  
243 main factors participating in polymer degradation and fragmentation on beaches <sup>23-25</sup>. Indeed, UV  
244 radiation causes photooxidative degradation, which results in breaking of the polymer chains,  
245 produces free radicals and reduces the molecular weight, causing deterioration of the material,  
246 after an unpredictable time <sup>26</sup>. This process rendered the textile fibers more subject to colonization  
247 in comparison to virgin HDPE microbeads, due to their advanced deteriorated stage, and likely  
248 facilitated the hydrolysis of carbon by hydrocarbon-degrading bacteria <sup>27</sup>. Another study, by  
249 Romera-Castillo et al., demonstrated that irradiated plastic debris stimulated microbial activity in  
250 a mesocosm experiment in comparison to virgin plastics, supporting the results obtained in our  
251 study <sup>28</sup>.

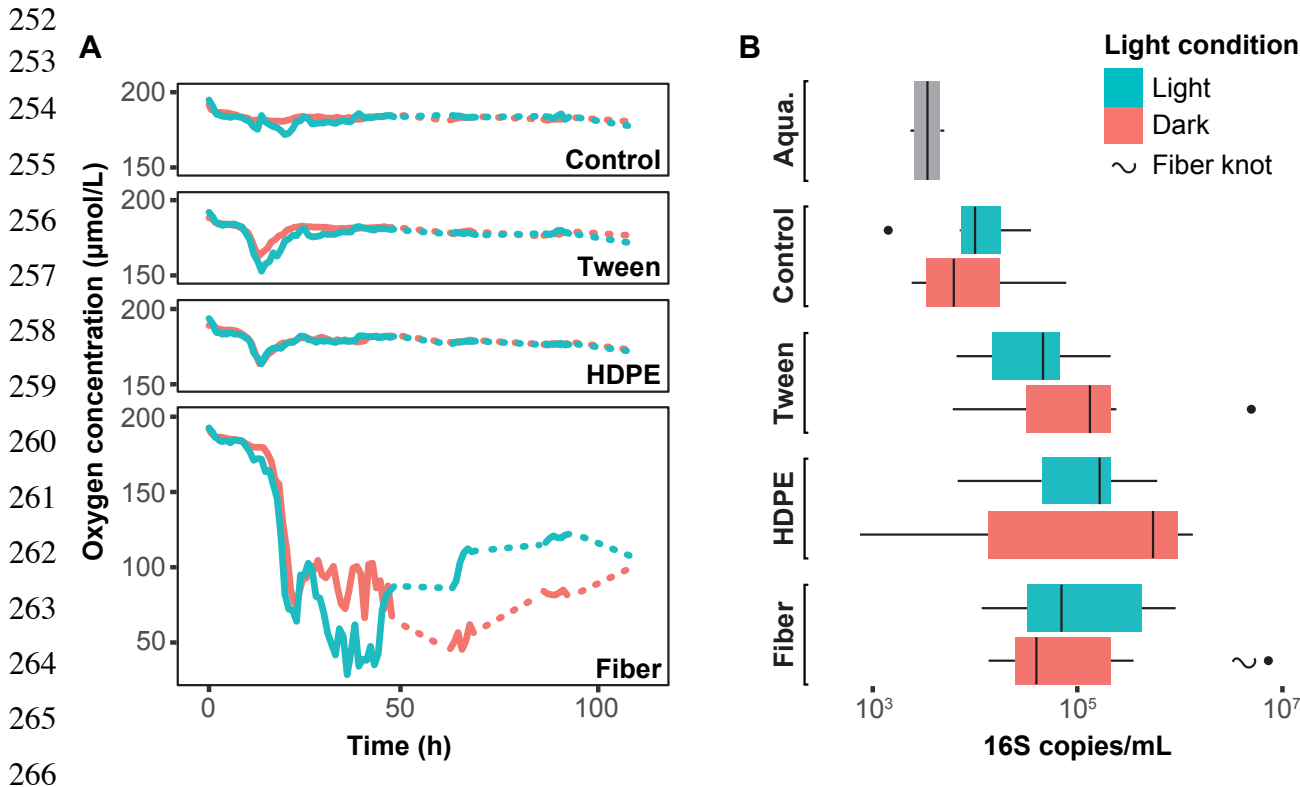

266  
267  
268  
269  
270  
271  
272  
273  
274  
275  
276  
277  
278  
279  
280  
281  
282  
283  
284  
285  
286  
287  
288  
289  
290  
291  
292  
293  
294  
295  
296  
297  
298  
299  
300  
301  
302  
303  
304  
305  
306  
307  
308  
309  
310  
311  
312  
313  
314  
315  
316  
317  
318  
319  
320  
321  
322  
323  
324  
325  
326  
327  
328  
329  
330  
331  
332  
333  
334  
335  
336  
337  
338  
339  
340  
341  
342  
343  
344  
345  
346  
347  
348  
349  
350  
351  
352  
353  
354  
355  
356  
357  
358  
359  
360  
361  
362  
363  
364  
365  
366  
367  
368  
369  
370  
371  
372  
373  
374  
375  
376  
377  
378  
379  
380  
381  
382  
383  
384  
385  
386  
387  
388  
389  
390  
391  
392  
393  
394  
395  
396  
397  
398  
399  
400  
401  
402  
403  
404  
405  
406  
407  
408  
409  
410  
411  
412  
413  
414  
415  
416  
417  
418  
419  
420  
421  
422  
423  
424  
425  
426  
427  
428  
429  
430  
431  
432  
433  
434  
435  
436  
437  
438  
439  
440  
441  
442  
443  
444  
445  
446  
447  
448  
449  
450  
451  
452  
453  
454  
455  
456  
457  
458  
459  
460  
461  
462  
463  
464  
465  
466  
467  
468  
469  
470  
471  
472  
473  
474  
475  
476  
477  
478  
479  
480  
481  
482  
483  
484  
485  
486  
487  
488  
489  
490  
491  
492  
493  
494  
495  
496  
497  
498  
499  
500  
501  
502  
503  
504  
505  
506  
507  
508  
509  
510  
511  
512  
513  
514  
515  
516  
517  
518  
519  
520  
521  
522  
523  
524  
525  
526  
527  
528  
529  
530  
531  
532  
533  
534  
535  
536  
537  
538  
539  
540  
541  
542  
543  
544  
545  
546  
547  
548  
549  
550  
551  
552  
553  
554  
555  
556  
557  
558  
559  
560  
561  
562  
563  
564  
565  
566  
567  
568  
569  
570  
571  
572  
573  
574  
575  
576  
577  
578  
579  
580  
581  
582  
583  
584  
585  
586  
587  
588  
589  
590  
591  
592  
593  
594  
595  
596  
597  
598  
599  
600  
601  
602  
603  
604  
605  
606  
607  
608  
609  
610  
611  
612  
613  
614  
615  
616  
617  
618  
619  
620  
621  
622  
623  
624  
625  
626  
627  
628  
629  
630  
631  
632  
633  
634  
635  
636  
637  
638  
639  
640  
641  
642  
643  
644  
645  
646  
647  
648  
649  
650  
651  
652  
653  
654  
655  
656  
657  
658  
659  
660  
661  
662  
663  
664  
665  
666  
667  
668  
669  
670  
671  
672  
673  
674  
675  
676  
677  
678  
679  
680  
681  
682  
683  
684  
685  
686  
687  
688  
689  
690  
691  
692  
693  
694  
695  
696  
697  
698  
699  
700  
701  
702  
703  
704  
705  
706  
707  
708  
709  
710  
711  
712  
713  
714  
715  
716  
717  
718  
719  
720  
721  
722  
723  
724  
725  
726  
727  
728  
729  
730  
731  
732  
733  
734  
735  
736  
737  
738  
739  
740  
741  
742  
743  
744  
745  
746  
747  
748  
749  
750  
751  
752  
753  
754  
755  
756  
757  
758  
759  
760  
761  
762  
763  
764  
765  
766  
767  
768  
769  
770  
771  
772  
773  
774  
775  
776  
777  
778  
779  
780  
781  
782  
783  
784  
785  
786  
787  
788  
789  
790  
791  
792  
793  
794  
795  
796  
797  
798  
799  
800  
801  
802  
803  
804  
805  
806  
807  
808  
809  
810  
811  
812  
813  
814  
815  
816  
817  
818  
819  
820  
821  
822  
823  
824  
825  
826  
827  
828  
829  
830  
831  
832  
833  
834  
835  
836  
837  
838  
839  
840  
841  
842  
843  
844  
845  
846  
847  
848  
849  
850  
851  
852  
853  
854  
855  
856  
857  
858  
859  
860  
861  
862  
863  
864  
865  
866  
867  
868  
869  
870  
871  
872  
873  
874  
875  
876  
877  
878  
879  
880  
881  
882  
883  
884  
885  
886  
887  
888  
889  
890  
891  
892  
893  
894  
895  
896  
897  
898  
899  
900  
901  
902  
903  
904  
905  
906  
907  
908  
909  
910  
911  
912  
913  
914  
915  
916  
917  
918  
919  
920  
921  
922  
923  
924  
925  
926  
927  
928  
929  
930  
931  
932  
933  
934  
935  
936  
937  
938  
939  
940  
941  
942  
943  
944  
945  
946  
947  
948  
949  
950  
951  
952  
953  
954  
955  
956  
957  
958  
959  
960  
961  
962  
963  
964  
965  
966  
967  
968  
969  
970  
971  
972  
973  
974  
975  
976  
977  
978  
979  
980  
981  
982  
983  
984  
985  
986  
987  
988  
989  
990  
991  
992  
993  
994  
995  
996  
997  
998  
999  
1000  
1001  
1002  
1003  
1004  
1005  
1006  
1007  
1008  
1009  
1010  
1011  
1012  
1013  
1014  
1015  
1016  
1017  
1018  
1019  
1020  
1021  
1022  
1023  
1024  
1025  
1026  
1027  
1028  
1029  
1030  
1031  
1032  
1033  
1034  
1035  
1036  
1037  
1038  
1039  
1040  
1041  
1042  
1043  
1044  
1045  
1046  
1047  
1048  
1049  
1050  
1051  
1052  
1053  
1054  
1055  
1056  
1057  
1058  
1059  
1060  
1061  
1062  
1063  
1064  
1065  
1066  
1067  
1068  
1069  
1070  
1071  
1072  
1073  
1074  
1075  
1076  
1077  
1078  
1079  
1080  
1081  
1082  
1083  
1084  
1085  
1086  
1087  
1088  
1089  
1090  
1091  
1092  
1093  
1094  
1095  
1096  
1097  
1098  
1099  
1100  
1101  
1102  
1103  
1104  
1105  
1106  
1107  
1108  
1109  
1110  
1111  
1112  
1113  
1114  
1115  
1116  
1117  
1118  
1119  
1120  
1121  
1122  
1123  
1124  
1125  
1126  
1127  
1128  
1129  
1130  
1131  
1132  
1133  
1134  
1135  
1136  
1137  
1138  
1139  
1140  
1141  
1142  
1143  
1144  
1145  
1146  
1147  
1148  
1149  
1150  
1151  
1152  
1153  
1154  
1155  
1156  
1157  
1158  
1159  
1160  
1161  
1162  
1163  
1164  
1165  
1166  
1167  
1168  
1169  
1170  
1171  
1172  
1173  
1174  
1175  
1176  
1177  
1178  
1179  
1180  
1181  
1182  
1183  
1184  
1185  
1186  
1187  
1188  
1189  
1190  
1191  
1192  
1193  
1194  
1195  
1196  
1197  
1198  
1199  
1200  
1201  
1202  
1203  
1204  
1205  
1206  
1207  
1208  
1209  
1210  
1211  
1212  
1213  
1214  
1215  
1216  
1217  
1218  
1219  
1220  
1221  
1222  
1223  
1224  
1225  
1226  
1227  
1228  
1229  
1230  
1231  
1232  
1233  
1234  
1235  
1236  
1237  
1238  
1239  
1240  
1241  
1242  
1243  
1244  
1245  
1246  
1247  
1248  
1249  
1250  
1251  
1252  
1253  
1254  
1255  
1256  
1257  
1258  
1259  
1260  
1261  
1262  
1263  
1264  
1265  
1266  
1267  
1268  
1269  
1270  
1271  
1272  
1273  
1274  
1275  
1276  
1277  
1278  
1279  
1280  
1281  
1282  
1283  
1284  
1285  
1286  
1287  
1288  
1289  
1290  
1291  
1292  
1293  
1294  
1295  
1296  
1297  
1298  
1299  
1300  
1301  
1302  
1303  
1304  
1305  
1306  
1307  
1308  
1309  
1310  
1311  
1312  
1313  
1314  
1315  
1316  
1317  
1318  
1319  
1320  
1321  
1322  
1323  
1324  
1325  
1326  
1327  
1328  
1329  
1330  
1331  
1332  
1333  
1334  
1335  
1336  
1337  
1338  
1339  
1340  
1341  
1342  
1343  
1344  
1345  
1346  
1347  
1348  
1349  
1350  
1351  
1352  
1353  
1354  
1355  
1356  
1357  
1358  
1359  
1360  
1361  
1362  
1363  
1364  
1365  
1366  
1367  
1368  
1369  
1370  
1371  
1372  
1373  
1374  
1375  
1376  
1377  
1378  
1379  
1380  
1381  
1382  
1383  
1384  
1385  
1386  
1387  
1388  
1389  
1390  
1391  
1392  
1393  
1394  
1395  
1396  
1397  
1398  
1399  
1400  
1401  
1402  
1403  
1404  
1405  
1406  
1407  
1408  
1409  
1410  
1411  
1412  
1413  
1414  
1415  
1416  
1417  
1418  
1419  
1420  
1421  
1422  
1423  
1424  
1425  
1426  
1427  
1428  
1429  
1430  
1431  
1432  
1433  
1434  
1435  
1436  
1437  
1438  
1439  
1440  
1441  
1442  
1443  
1444  
1445  
1446  
1447  
1448  
1449  
1450  
1451  
1452  
1453  
1454  
1455  
1456  
1457  
1458  
1459  
1460  
1461  
1462  
1463  
1464  
1465  
1466  
1467  
1468  
1469  
1470  
1471  
1472  
1473  
1474  
1475  
1476  
1477  
1478  
1479  
1480  
1481  
1482  
1483  
1484  
1485  
1486  
1487  
1488  
1489  
1490  
1491  
1492  
1493  
1494  
1495  
1496  
1497  
1498  
1499  
1500  
1501  
1502  
1503  
1504  
1505  
1506  
1507  
1508  
1509  
1510  
1511  
1512  
1513  
1514  
1515  
1516  
1517  
1518  
1519  
1520  
1521  
1522  
1523  
1524  
1525  
1526  
1527  
1528  
1529  
1530  
1531  
1532  
1533  
1534  
1535  
1536  
1537  
1538  
1539  
1540  
1541  
1542  
1543  
1544  
1545  
1546  
1547  
1548  
1549  
1550  
1551  
1552  
1553  
1554  
1555  
1556  
1557  
1558  
1559  
1560  
1561  
1562  
1563  
1564  
1565  
1566  
1567  
1568  
1569  
1570  
1571  
1572  
1573  
1574  
1575  
1576  
1577  
1578  
1579  
1580  
1581  
1582  
1583  
1584  
1585  
1586  
1587  
1588  
1589  
1590  
1591  
1592  
1593  
1594  
1595  
1596  
1597  
1598  
1599  
1600  
1601  
1602  
1603  
1604  
1605  
1606  
1607  
1608  
1609  
1610  
1611  
1612  
1613  
1614  
1615  
1616  
1617  
1618  
1619  
1620  
1621  
1622  
1623  
1624  
1625  
1626  
1627  
1628  
1629  
1630  
1631  
1632  
1633  
1634  
1635  
1636  
1637  
1638  
1639  
1640  
1641  
1642  
1643  
1644  
1645  
1646  
1647  
1648  
1649  
1650  
1651  
1652  
1653  
1654  
1655  
1656  
1657  
1658  
1659  
1660  
1661  
1662  
1663  
1664  
1665  
1666  
1667  
1668  
1669  
1670  
1671  
1672  
1673  
1674  
1675  
1676  
1677  
1678  
1679  
1680  
1681  
1682  
1683  
1684  
1685  
1686  
1687  
1688  
1689  
1690  
1691  
1692  
1693  
1694  
1695  
1696  
1697  
1698  
1699  
1700  
1701  
1702  
1703  
1704  
1705  
1706  
1707  
1708  
1709  
1710  
1711  
1712  
1713  
1714  
1715  
1716  
1717  
1718  
1719  
1720  
1721  
1722  
1723  
1724  
1725  
1726  
1727  
1728  
1729  
1730  
1731  
1732  
1733  
1734  
1735  
1736  
1737  
1738  
1739  
1740  
1741  
1742  
1743  
1744  
1745  
1746  
1747  
1748  
1749  
1750  
1751  
1752  
1753  
1754  
1755  
1756  
1757  
1758  
1759  
1760  
1761  
1762  
1763  
1764  
1765  
1766  
1767  
1768  
1769  
1770  
1771  
1772  
1773  
1774  
1775  
1776  
1777  
1778  
1779  
1780  
1781  
1782  
1783  
1784  
1785  
1786  
1787  
1788  
1789  
1790  
1791  
1792  
1793  
1794  
1795  
1796  
1797  
1798  
1799  
1800  
1801  
1802  
1803  
1804  
1805  
1806  
1807  
1808  
1809  
1810  
1811  
1812  
1813  
1814  
1815  
1816  
1817  
1818  
1819  
1820  
1821  
1822  
1823  
1824  
1825  
1826  
1827  
1828  
1829  
1830  
1831  
1832  
1833  
1834  
1835  
1836  
1837  
1838  
1839  
1840  
1841  
1842  
1843  
1844  
1845  
1846  
1847  
1848  
1849  
1850  
1851  
1852  
1853  
1854  
1855  
1856  
1857  
1858  
1859  
1860  
1861  
1862  
1863  
1864  
1865  
1866  
1867  
1868  
1869  
1870  
1871  
1872  
1873  
1874  
1875  
1876  
1877  
1878  
1879  
1880  
1881  
1882  
1883  
1884  
1885  
1886  
1887  
1888  
1889  
1890  
1891  
1892  
1893  
1894  
1895  
1896  
1897  
1898  
1899  
1900  
1901  
1902  
1903  
1904  
1905  
1906  
1907  
1908  
1909  
1910  
1911  
1912  
1913  
1914  
1915  
1916  
1917  
1918  
1919  
1920  
1921  
1922  
1923  
1924  
1925  
1926  
1927  
1928  
1929  
1930  
1931  
1932  
1933  
1934  
1935  
1936  
1937  
1938  
1939  
1940  
1941  
1942  
1943  
1944  
1945  
1946  
1947  
1948  
1949  
1950  
1951  
1952  
1953  
1954  
1955  
1956  
1957  
1958  
1959  
1960  
1961  
1962  
1963  
1964  
1965  
1966  
1967  
1968  
1969  
1970  
1971  
1972  
1973  
1974  
1975  
1976  
1977  
1978  
1979  
1980  
1981  
1982  
1983  
1984  
1985  
1986  
1987  
1988  
1989  
1990  
1991  
1992  
1993  
1994  
1995  
1996  
1997  
1998  
1999  
2000  
2001  
2002  
2003  
2004  
2005  
2006  
2007  
2008  
2009  
2010  
2011  
2012  
2013  
2014  
2015  
2016  
2017  
2018  
2019  
2020  
2021  
2022  
2023  
2024  
2025  
2026  
2027  
2028  
2029  
2030  
2031  
2032  
2033  
2034  
2035  
2036  
2037  
2038  
2039  
2040  
2041  
2042  
2043  
2044  
2045  
2046  
2047  
2048  
2049  
2050  
2051  
2052  
2053  
2054  
2055  
2056  
2057  
2058  
2059  
2060  
2061  
2062  
2063  
2064  
2065  
2066  
2067  
2068  
2069  
2070  
2071  
2072  
2073  
2074  
2075  
2076  
2077  
2078  
2079  
2080  
2081  
2082  
2083  
2084  
2085  
2086  
2087  
2088  
2089  
2090  
2091  
2092  
2093  
2094  
2095  
2096  
2097  
2098  
2099  
2100  
2101  
2102  
2103  
2104  
2105  
2106  
2107  
2108  
2109  
2110  
2111  
2112  
2113  
2114  
2115  
2116  
2117  
2118  
2119  
2120  
2121  
2122  
2123  
2124  
2125  
2126  
2127  
2128  
2129  
2130  
2131  
2132  
2133  
2134  
2135  
2136  
2137  
2138  
2139  
2140  
2141  
2142  
2143  
2144  
2145  
2146  
2147  
2148  
2149  
2150  
2151  
2152  
2153  
2154  
2155  
2156  
2157  
2158  
2159  
2160  
2161  
2162  
2163  
2164  
2165  
2166  
2167  
2168  
2169  
2170  
2171  
2172  
2173  
2174  
2175  
2176  
2177  
2178  
2179  
2180  
2181  
2182  
2183  
2184  
2185  
2186  
2187  
2188  
2189  
2190  
2191  
2192  
2193  
2194  
2195  
2196  
2197  
2198  
2199  
2200  
2201  
2202  
2203  
2204  
2205  
2206  
2207  
2208  
2209  
2210  
2211  
2212  
2213  
2214  
2215  
2216  
2217  
2218  
2219  
2220  
2221  
2222  
2223  
2224  
2225  
2226  
2227  
2228  
2229  
2230  
2231  
2232  
2233  
2234  
2235  
2236  
2237  
2238  
2239  
2240  
2241  
2242  
2243  
2244  
2245  
2246  
2247  
2248  
2249  
2250  
2251  
2252  
2253  
2254  
2255  
2256  
2257  
2258  
2259  
2260  
2261  
2262  
2263  
2264  
2265  
2266  
2267  
2268  
2269  
2270  
2271  
2272  
2273  
2274  
2275  
2276  
2277  
2278  
2279  
2280  
2281  
2282  
2283  
2284  
2285  
2286  
2287  
2288  
2289  
2290  
2291  
2292  
2293  
2294  
2295  
2296  
2297  
2298  
22

269

270

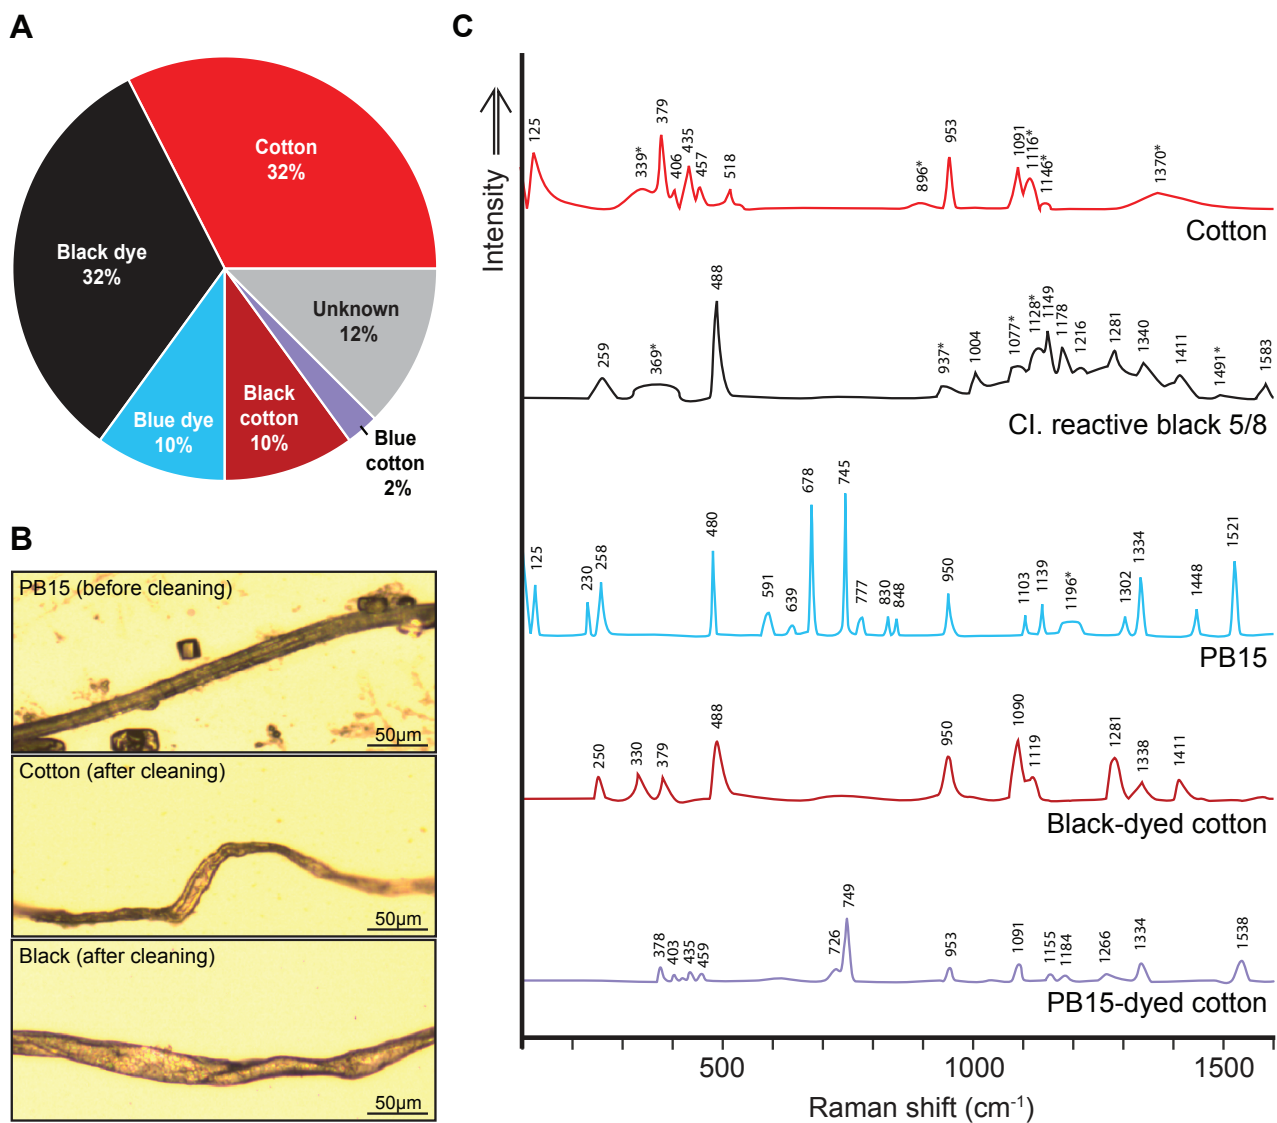

**Figure 3.** Analysis of the textile fiber sample extracted from the intertidal sediment at Coral Eye Resort. A) fiber type ratio based on signals obtained with Raman spectroscopy. B) photomicrographs of different fibers measured with Raman spectroscopy, illustrating examples of fibers before and after cleaning. C) Raman spectra of five fiber types identified. Numbers indicate the position of the peaks (cm<sup>-1</sup>) and the associated asterisk (\*) indicates a broad peak. Note: in 42% of the measurements, only the pigment signals were expressed, covering the polymer signature and preventing the identification of the fabric of those fibers. Only cotton seems to have a signal strong enough to overcome the pigment signature.

271

272

273

274 **Microbial community development.** Another indication that microbial communities developed  
275 according to the provided carbon source (i.e., tween, HDPE microbeads and intertidal textile  
276 fibers) is the higher amount of 16S copies in tween, HDPE and textile fiber incubations measured  
277 using qPCR, in comparison to the control incubations (Fig. 2B). Moreover, microbial communities  
278 were significantly different (Analysis of Similarity:  $P < 0.01$ ) between incubation types (Fig. 4),  
279 in comparison to the initial microbial community measure from the aquarium, which was  
280 dominated by the families Bacillaceae, Planctomycetaceae, Bacteriovoraceae and  
281 Cellvibrionaceae (Fig. 5).

282 Flavobacteriaceae and Vibrionaceae were particularly ubiquitous in control, tween and HDPE  
283 incubations. However, HDPE-incubated communities were enriched with bacteria from the Family  
284 Alcanivoraceae, whereas communities from the textile fiber incubations were enriched with

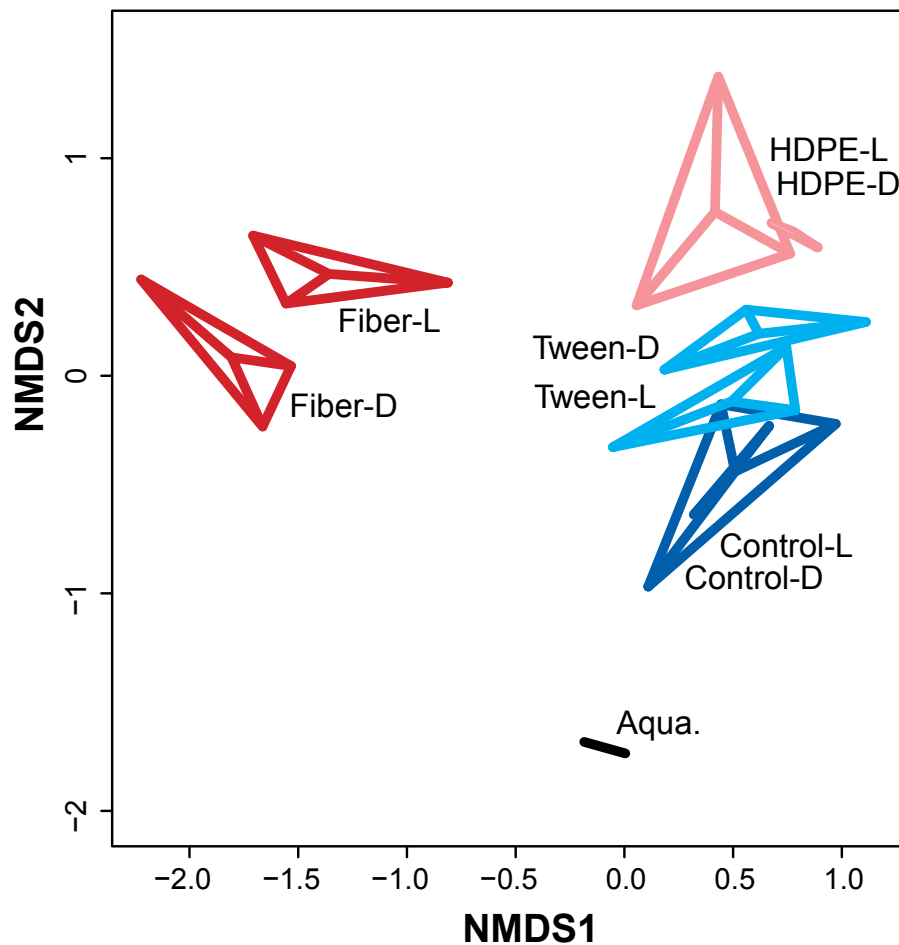

**Figure 4.** Non-metric multidimensional scaling (NMDS) analysis highlighting the difference in arbitrary distances between incubation-specific microbial communities (ANOSIM  $p = 0.001$ ).

285 bacteria from the Kordiimonadaceae and Cellvibrionaceae (Fig. 5). The observed difference  
 286 between microbial communities from micropollutant-bearing and control incubations might also  
 287 be explained by an accumulation of plastic-associated dissolved organic carbon (DOC) in the  
 288 microcosms<sup>28</sup>. Romera-Castillo et al. discovered that plastic debris releases a non-negligible  
 289 amount of DOC, most of it leaches within the first few days after the initial contact with seawater,  
 290 which would be applicable to the virgin HDPE microbeads<sup>28</sup>.

291 Control and tween incubations had a highly variable microbial communities between replicates,  
 292 whereas HDPE and textile fiber incubations showed very similar replicates. Nonetheless, all had  
 293 differences in the community composition between light and dark settings (Fig. 4, 5). The disparity  
 294 between microbial communities from incubations with HDPE microbeads and textile fibers

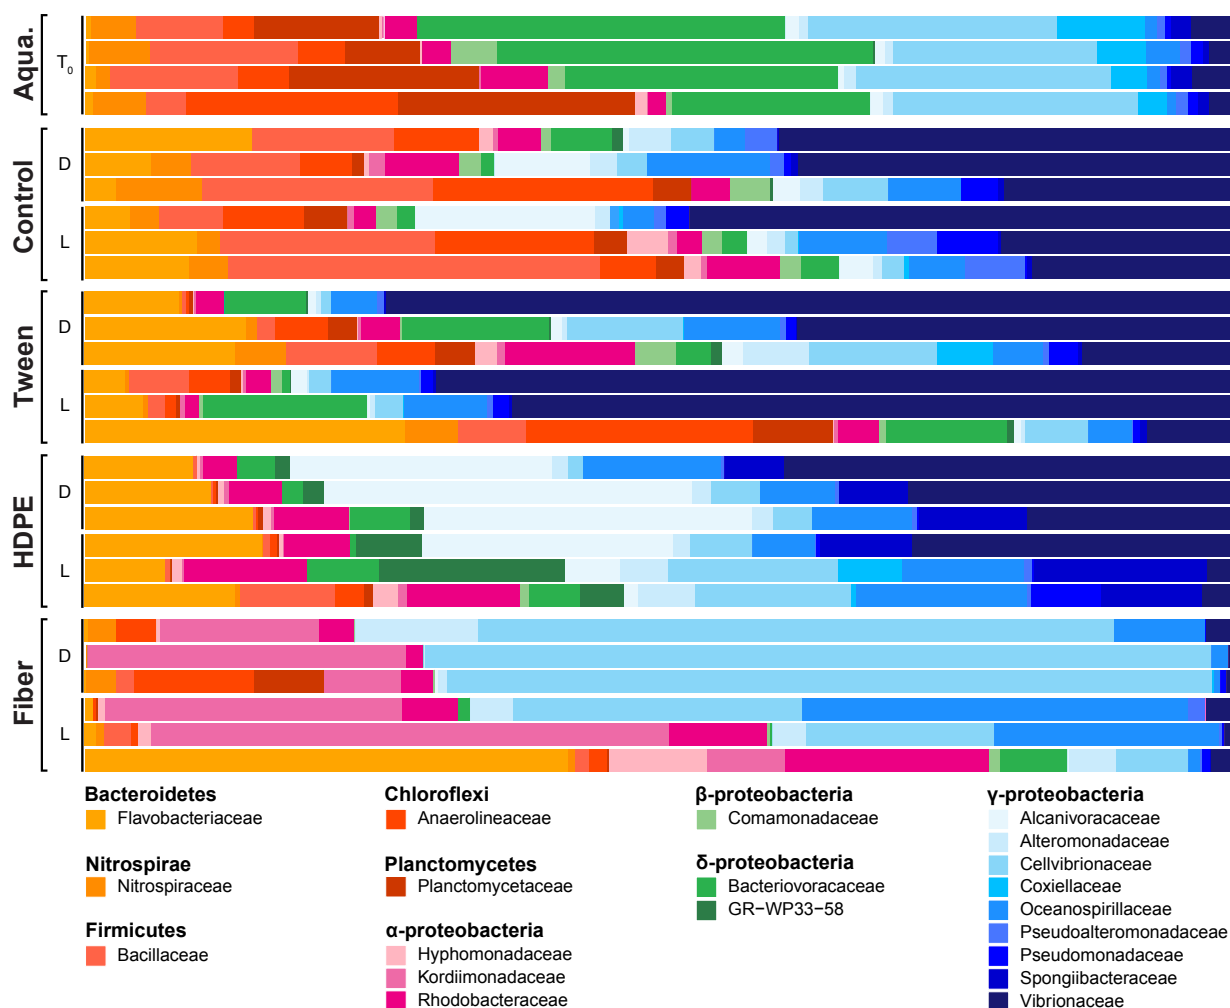

**Figure 5.** The relative proportion of the 20 most abundant families across all incubations, separated into incubation types and light conditions (T<sub>0</sub>: initial community; D: dark; L: light).

295 indicates the development of polymer-dependent taxa, which is also supported by the findings of  
 296 Frère et al. (2018). The families Oceanospirillaceae, Vibrionaceae, Flavobacteriaceae and  
 297 Rhodobacteraceae are putative to the plastisphere with common representatives in HDPE and  
 298 textile fiber incubations, however less diverse than previously observed in other studies<sup>3,5</sup>. This  
 299 might be related to the short experimental time; micropollutants and debris are otherwise  
 300 accumulating over months and years in the ocean<sup>30</sup>.

301 Operational taxonomic units (OTUs) of bacteria that were enriched in particular incubations  
 302 were identified (Fig. 6). Thirty-one OTUs are shared between all incubation types and the  
 303 aquarium water itself, of which two OTUs, i.e., OTU001 ( $\gamma$ -proteobacteria) and OTU004  
 304 (Flavobacteriia), were highly abundant across all incubations (Fig. 6). Only one taxon was  
 305 especially enriched in the tween incubation and shared some OTUs with HDPE and control  
 306 incubations, which were largely affiliated with the  $\gamma$ -proteobacteria. Textile fibers were especially  
 307 colonized by  $\alpha$ - and  $\gamma$ -proteobacteria, identified as first colonizers<sup>6,7</sup>. HDPE incubations were  
 308 mainly characterized by the development of Bacteroidetes (i.e., Family Flavobacteriaceae),  
 309 additionally to  $\alpha$ - and  $\gamma$ -proteobacteria, hypothesized to colonize plastics at a later stage<sup>6,7</sup>.

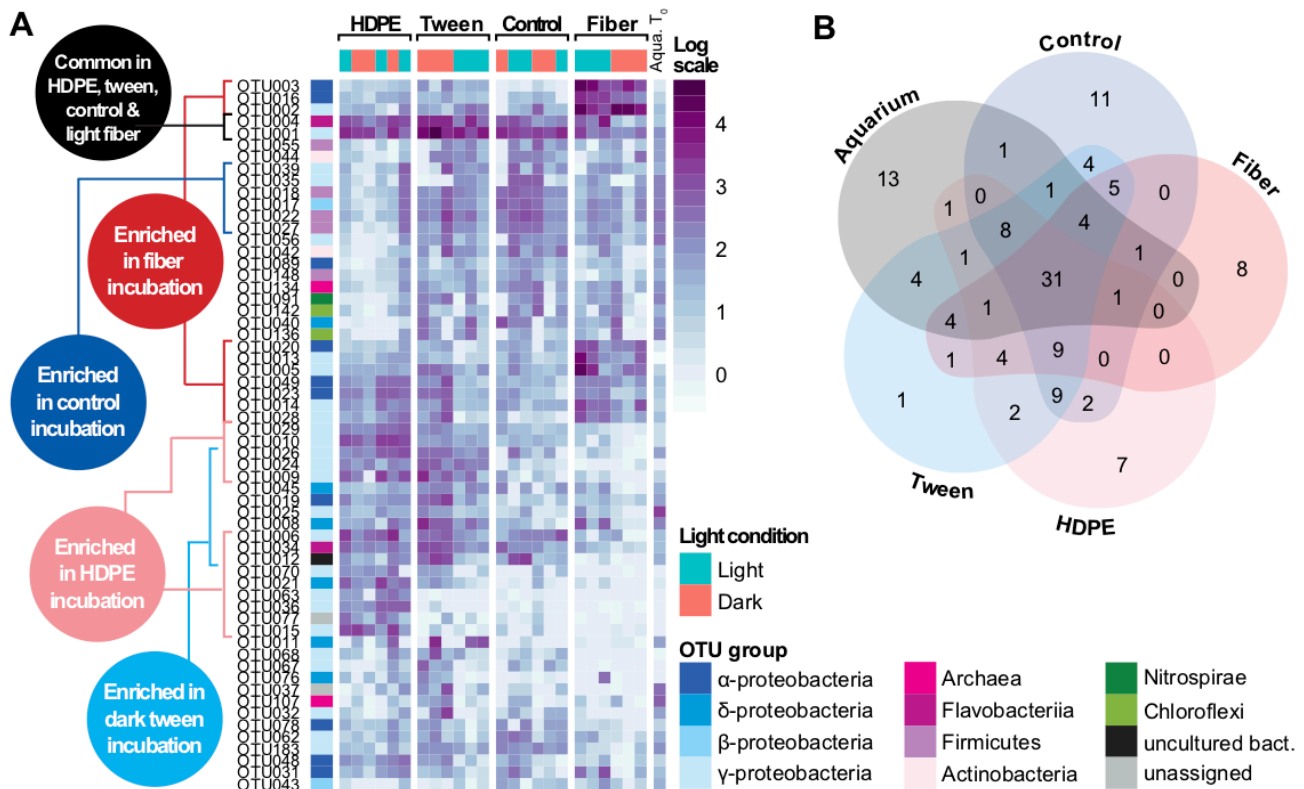

**Figure 6.** A) Log-scaled heat map highlighting the abundance of the 10 most abundant OTUs in each incubation. B) Venn diagram showing a core community, and incubation-specific OTUs.

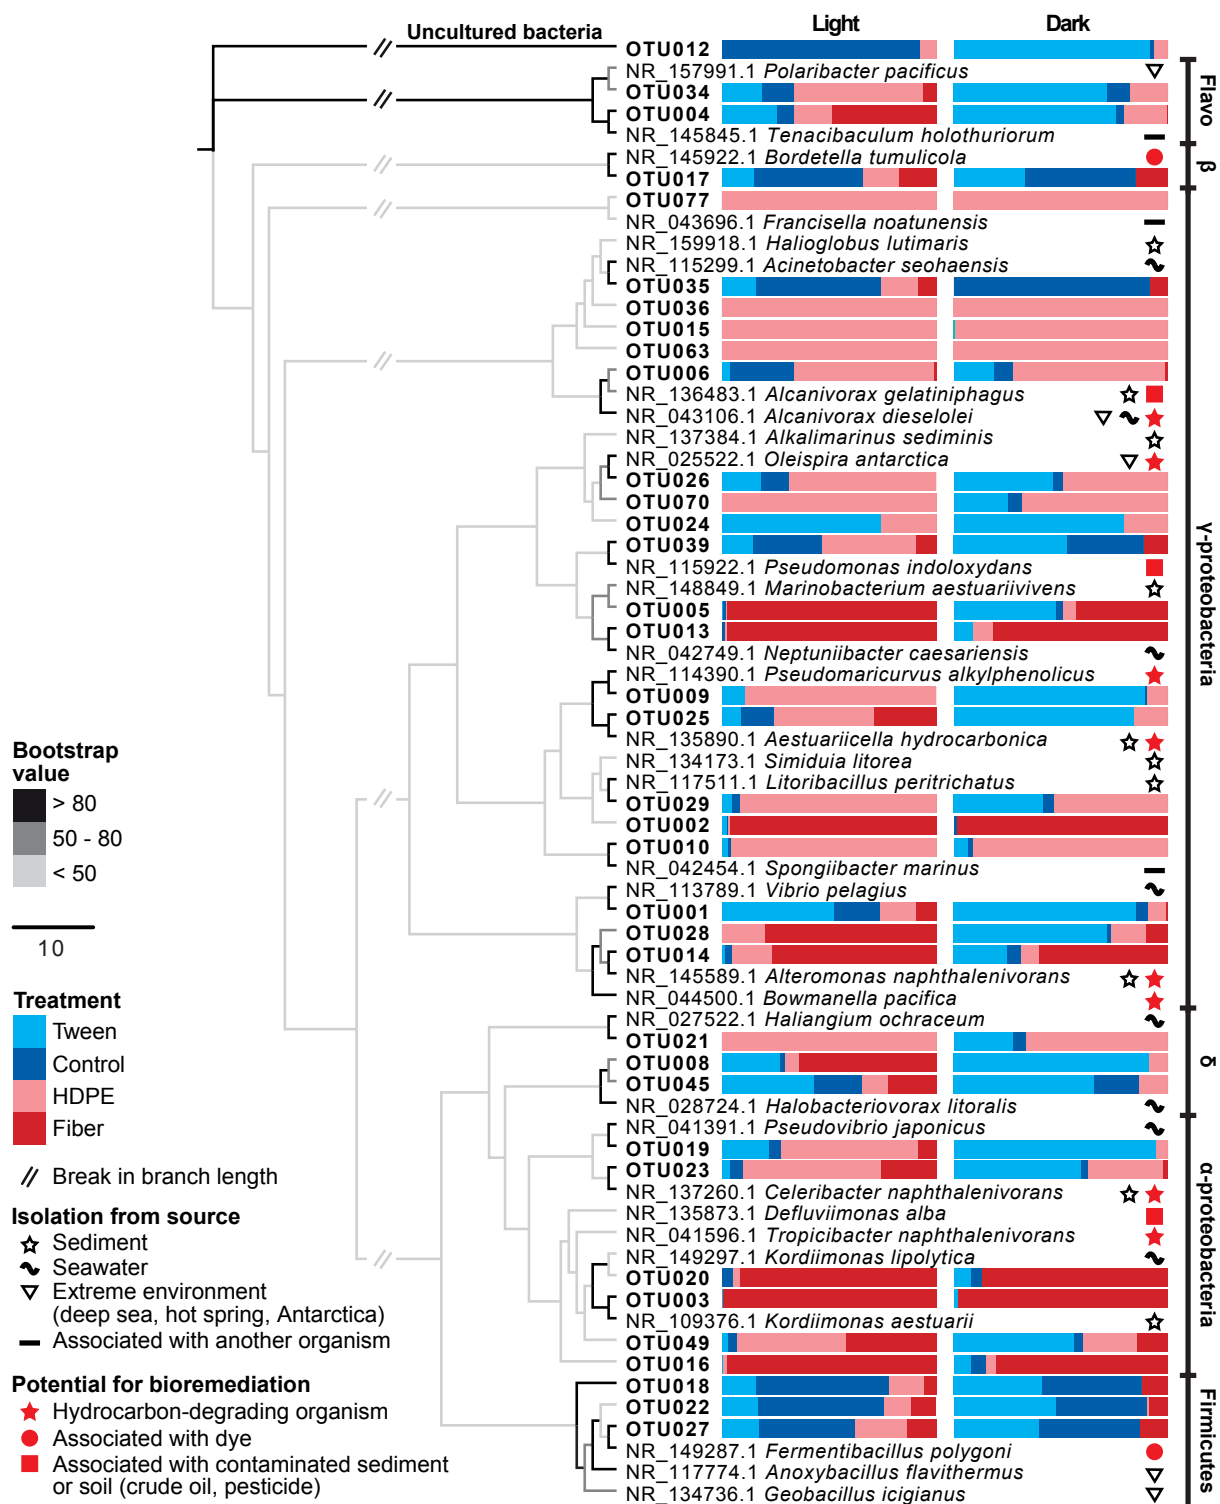

**Figure 7.** Phylogenetic reconstruction of 36 OTUs identified as incubation-enriched in Fig. 6 and their closest associated named species from NCBI database. The relative abundance of OTUs in each incubation (pale blue: tween; dark blue: control; pale red: HDPE; dark red: fiber) is represented by bar charts, divided according to the light condition. Named- species microorganisms were classified based on their isolation from the source (black star, wave, triangle and line) and marked for their potential to bioremediate microplastics (red star, circle and square).

311 **Impact of light on microbial development.** The presence of light was correlated with the  
312 development of unique microbial communities, especially observable in HDPE and textile fiber  
313 incubations, similar to the findings of Fuhrman et al. (2008) and Sánchez et al. (2017) regarding  
314 the impact of light on the microbial communities<sup>31,32</sup>. Indeed, the dark-incubated HDPE microbial  
315 community was dominated by the three families Vibrionaceae, Alcanivoracaceae and  
316 Flavobacteriaceae, whereas the light-grown HDPE microbial community was more diverse with a  
317 shared dominance between eight families (Rhodobacteraceae, GR-WP33-58, Spongiibacteraceae,  
318 Vibrionaceae, Cellvibrionaceae, Oceanospirillaceae, Alcanivoracaceae, and Flavobacteriaceae)  
319 (Fig. 5).

320 Some taxa were enriched under artificial sunlight when incubated with HDPE and textile fibers,  
321 but enriched in the presence of Tween 20 under dark conditions. This observation is well  
322 represented by OTU028 and OTU049, which were most abundant in textile fiber and HDPE  
323 incubations in the presence of light, otherwise dominant in the tween incubation under dark  
324 conditions. In general, OTUs enriched in Tween-20 incubations had a higher relative abundance  
325 in dark settings, also supported by our qPCR results. The flexibility these taxa show in using carbon  
326 from various sources (HDPE microbeads vs Tween 20) depending on the light availability might  
327 highlight an opportunistic behaviour<sup>33</sup>. Another hypothesis suggests a higher level of available  
328 DOC in light-exposed textile fiber and HDPE incubations, caused by the polymer exposure to  
329 artificial sunlight<sup>13,28</sup>. These findings may help us better understand the plastisphere dynamic in  
330 situations similar to, for example, microorganisms settled on plastic debris initially floating in the  
331 photic zone and later buried in the sediment or sinking in regions with limited light availability.

332  
333 **Hydrocarbon-degrading bacteria.** Several OTUs enriched in the different incubation types  
334 revealed to be closely related to known hydrocarbon degrading microorganisms (Fig. 7). This,  
335 together with the increased rates of oxygen consumption in those incubations, highlights their  
336 potential for biodegradation of organic carbon based micropollutants. The six most abundant  
337 OTUs of the textile fiber incubation (OTU002, -003, -005, -013, -016 and -020) are closely related  
338 to the genera *Kordiimonas* and *Defluviimonas* ( $\alpha$ -proteobacteria), and *Simiduila*,  
339 *Marinobacterium* and *Neptuniibacter* ( $\gamma$ -proteobacteria) according to the inferred phylogenetic  
340 tree. OTU003 and -020 were also closely related to *K. gwangyangensis* (NR\_043103.1), which  
341 can hydrolyze six different polycyclic aromatic hydrocarbons (PAHs)<sup>34</sup>, giving this taxon a strong



342 potential for microplastic bioremediation. The genus *Alteromonas*, hosting hydrocarbon-degrading  
343 microorganisms, has been previously identified as part of the plastisphere from North Adriatic Sea  
344 and Atlantic Ocean <sup>5,35</sup>. More specifically, *Alteromonas naphthalenivorans* was identified as a  
345 naphthalene consumer <sup>36</sup>. *Defluviimonas alba* was isolated from an oilfield water sample  
346 suggesting that it has a potential for degradation of hydrocarbon similarly to *Defluviimonas*  
347 *pyrenivorans* <sup>37</sup>, however not tested for hydrocarbon hydrolysis <sup>38</sup>. *Bowmanella pacifica* was  
348 identified during a search for pyrene-degrading bacteria <sup>39</sup>, which is a PAH highly concentrated in  
349 certain plastics <sup>40</sup>. *Bowmanella* spp. were also identified on polyethylene terephthalate (PET)  
350 specific assemblages from Northern European waters <sup>41</sup>. Because these taxa were probably  
351 biofilm-forming microorganisms developed on the surface of textile fibers, it is very likely that  
352 they partly consumed the polymer, an available source of carbon and energy, owing to their  
353 capability to hydrolyze hydrocarbons. Although approximately half of the fibers used in the  
354 experiment were of natural fabric, it has been observed that cotton is a powerful sorbent used to  
355 treat oil spill <sup>42</sup>. The latter suggest that cotton fibers may absorb traces of hydrocarbon present in  
356 the environment <sup>43</sup> and, therefore, provide a source of hydrocarbon for hydrocarbonoclastic  
357 bacteria.

358 The HDPE incubation stimulated the activity and enrichment of six OTUs (OTU001, -004, -006,  
359 -010, -015 and -026) closely related to hydrocarbon-degrading bacteria, different from those  
360 enriched in textile fiber incubations. For instance, OTU006 was affiliated with the genus  
361 *Alcanivorax*, which are specialized in degrading alkanes, especially in contaminated marine  
362 environments <sup>44</sup>. This genus was also identified as being potentially important for PET degradation  
363 in the natural marine environment <sup>41</sup>. All other five OTUs were abundant only in light-grown  
364 HDPE communities, which were affiliated with the taxa *Pseudomarcus alkylphenolicus*,  
365 *Celeribacter naphthalenivorans*, *Oleispira antarctica*, *Tropicibacter naphthalenivorans*, and  
366 *Aestuariicella hydrocarbonica*. Given their enrichment in the HDPE incubations in the presence  
367 of light, and the increased oxygen consumption relative to the control, it seems likely that these  
368 conditions selected for these specific organisms that were uniquely adept to utilize organic carbon  
369 from the HDPE as a carbon and energy source. This indicates their potential for the bioremediation  
370 of this plastic type. The different respiration rates of HPDE treatment and community assembly  
371 compared to the Tween 20 treatment (an emulsifier for the HDPE microbeads) and demonstrates

372 a unique effect on microbial community formation due to the HDPE itself (as opposed to microbes  
373 that may just be eating the Tween that is coated on the HDPE).

374  
375 **Extrapolating from our experiment to the natural environment.** Although this study did not  
376 use “natural” microbial communities from the intertidal habitats from which the textile fibers  
377 derive, it tests for the potential response of microbial communities to widespread micropollutants.  
378 Since the identified hydrocarbonoclastic bacteria in our incubations are also common to both  
379 natural marine sediments and water column<sup>5,34,39,41,44</sup>, this study contributes to the developing  
380 understanding of how hydrocarbon-degrading bacteria utilize various fabric types as a carbon and  
381 energy sources during bioremediation processes. Three main lines of evidence indicate that the  
382 plastics and textile fibers were consumed by hydrocarbon-degrading microorganisms during the  
383 experiment: (1) higher rates of oxygen consumption relative to the control, (2) increased  
384 abundance as indicated by qPCR and (3) the development of unique microbial communities that  
385 form in incubations containing different types of micropollutants. Moreover, the same groups of  
386 hydrocarbonoclastic bacteria found in our study are present in the marine environment. The  
387 findings resulting from this study also demonstrated that light availability is an important factor  
388 shaping hydrocarbon-degrading bacterial communities. We speculate that this is due to  
389 photochemical dissolution of the plastic and textile substrates, which might allow for more readily  
390 bioavailable substrates for the developing biofilms. A deeper study into the topic is necessary to  
391 enlarge our understanding behind microbial adaptation to changing environmental conditions,  
392 including photochemical dissolution of plastic waste.

393

## 394 **ACKNOWLEDGEMENTS**

395 This study was conducted within the frame of the program Lehre@LMU, part of the Geobiology  
396 and Paleobiology section of the Department of Earth and Environmental Sciences, Ludwig-  
397 Maximilians-Universität München. We thank Coral Eye Resort (Marco Segre Reinach) for  
398 providing the textile fibers and the Indonesian authorities for providing the research visa and  
399 permit (research permit holder: Elsa Girard; SIP no.: 97/E5/E5.4/SIP/2019). We are also grateful  
400 for the time Aurèle Vuillemin, Ömer Coskun, Paula R. Ramirez, and Nicola Conci took to help us  
401 in the lab and with the data analysis.

402 This study was funded by Lehre@LMU (project number: S19\_F2.; Studi\_Forscht@GEO), and  
403 to budget funds to WO and GW. GW acknowledges support by LMU Munich's Institutional  
404 Strategy LMUexcellent within the framework of the German Excellence Initiative for aquarium  
405 set-up and maintenance.

406

407

## 408 REFERENCES

409 (1) Scott, G. Polymers in Modern Life. In *Polymers and the Environment*; Scott, G., Ed.; Royal Society of  
410 Chemistry, 1999; pp 1–18.

411 (2) Jambeck, J. R.; Geyer, R.; Wilcox, C.; Siegler, T. R.; Perryman, M.; Andrady, A.; Narayan, R.; Law, K. L.  
412 Plastic Waste Inputs from Land into the Ocean. *Science* **2015**, *347* (6223), 764–768.

413 (3) Frère, L.; Maignien, L.; Chalopin, M.; Huvet, A.; Rinnert, E.; Morrison, H.; Kerninon, S.; Cassone, A.-L.;  
414 Lambert, C.; Reveillaud, J.; et al. Microplastic Bacterial Communities in the Bay of Brest: Influence of Polymer Type  
415 and Size. *Environ. Pollut.* **2018**, *242* (Pt A), 614–625.

416 (4) Summer, W. Microbial Degradation of Plastics. *Anti-Corros. Methods Mater.* **1964**, *11* (4), 19–21.

417 (5) Zettler, E. R.; Mincer, T. J.; Amaral-Zettler, L. A. Life in the “Plastisphere”: Microbial Communities on  
418 Plastic Marine Debris. *Environ. Sci. Technol.* **2013**, *47* (13), 7137–7146.

419 (6) Oberbeckmann, S.; Löder, M. G. J.; Labrenz, M. Marine Microplastic-Associated Biofilms – a Review.  
420 *Environ. Chem.* **2015**, *12* (5), 551–562.

421 (7) Quero, G. M.; Luna, G. M. Surfing and Dining on the “plastisphere”: Microbial Life on Plastic Marine  
422 Debris. *Advances in Oceanography and Limnology* **2017**, *8*(2), 199–207.

423 (8) Krueger, M. C.; Harms, H.; Schlosser, D. Prospects for Microbiological Solutions to Environmental Pollution  
424 with Plastics. *Appl. Microbiol. Biotechnol.* **2015**, *99* (21), 8857–8874.

425 (9) Yoshida, S.; Hiraga, K.; Takehana, T.; Taniguchi, I.; Yamaji, H.; Maeda, Y.; Toyohara, K.; Miyamoto, K.;  
426 Kimura, Y.; Oda, K. A Bacterium That Degrades and Assimilates Poly(ethylene Terephthalate). *Science* **2016**, *351*  
427 (6278), 1196–1199.

428 (10) Lamb, J. B.; Willis, B. L.; Fiorenza, E. A.; Couch, C. S.; Howard, R.; Rader, D. N.; True, J. D.; Kelly, L. A.;  
429 Ahmad, A.; Jompa, J.; et al. Plastic Waste Associated with Disease on Coral Reefs. *Science* **2018**, *359* (6374), 460–  
430 462.

- 431 (11) Dris, R.; Gasperi, J.; Saad, M.; Mirande, C.; Tassin, B. Synthetic Fibers in Atmospheric Fallout: A Source  
432 of Microplastics in the Environment? *Mar. Pollut. Bull.* **2016**, *104* (1-2), 290–293.
- 433 (12) Browne, M. A.; Crump, P.; Niven, S. J.; Teuten, E.; Tonkin, A.; Galloway, T.; Thompson, R. Accumulation  
434 of Microplastic on Shorelines Worldwide: Sources and Sinks. *Environ. Sci. Technol.* **2011**, *45* (21), 9175–9179.
- 435 (13) Zhu, L.; Zhao, S.; Bittar, T. B.; Stubbins, A.; Li, D. Photochemical Dissolution of Buoyant Microplastics to  
436 Dissolved Organic Carbon: Rates and Microbial Impacts. *J. Hazard. Mater.* **2020**, *383*, 121065.
- 437 (14) Pichler, M.; Coskun, Ö. K.; Ortega-Arbulú, A.-S.; Conci, N.; Wörheide, G.; Vargas, S.; Orsi, W. D. A 16S  
438 rRNA Gene Sequencing and Analysis Protocol for the Illumina MiniSeq Platform. *MicrobiologyOpen* **2018**, e00611.
- 439 (15) Coskun, Ö. K.; Pichler, M.; Vargas, S.; Gilder, S.; Orsi, W. D. Linking Uncultivated Microbial Populations  
440 and Benthic Carbon Turnover by Using Quantitative Stable Isotope Probing. *Appl. Environ. Microbiol.* **2018**, *84* (18).  
441 <https://doi.org/10.1128/AEM.01083-18>.
- 442 (16) Edgar, R. Taxonomy Annotation and Guide Tree Errors in 16S rRNA Databases. *PeerJ* **2018**, *6*, e5030.
- 443 (17) R Core Team. *R: A Language and Environment for Statistical Computing*; R Foundation for Statistical  
444 Computing: Vienna, Austria, 2017.
- 445 (18) Gouy, M.; Guindon, S.; Gascuel, O. SeaView Version 4: A Multiplatform Graphical User Interface for  
446 Sequence Alignment and Phylogenetic Tree Building. *Mol. Biol. Evol.* **2010**, *27* (2), 221–224.
- 447 (19) Guindon, S.; Dufayard, J.-F.; Lefort, V.; Anisimova, M.; Hordijk, W.; Gascuel, O. New Algorithms and  
448 Methods to Estimate Maximum-Likelihood Phylogenies: Assessing the Performance of PhyML 3.0. *Syst. Biol.* **2010**,  
449 *59* (3), 307–321.
- 450 (20) Buzzini, P.; Massonnet, G. The Discrimination of Colored Acrylic, Cotton, and Wool Textile Fibers Using  
451 Micro-Raman Spectroscopy. Part 1: In Situ Detection and Characterization of Dyes. *J. Forensic Sci.* **2013**, *58* (6),  
452 1593–1600.
- 453 (21) Bouchard, M.; Rivenc, R.; Menke, C.; Learner, T. Micro-FTIR and Micro-Raman Full Paper Study of Paints  
454 Used by San Francisco. *e-PS* **2009**, *6*, 27–37.
- 455 (22) Dris, R.; Gasperi, J.; Mirande, C.; Mandin, C.; Guerrouache, M.; Langlois, V.; Tassin, B. A First Overview  
456 of Textile Fibers, Including Microplastics, in Indoor and Outdoor Environments. *Environ. Pollut.* **2017**, *221*, 453–  
457 458.
- 458 (23) Andrady, A. L. The Plastic in Microplastics: A Review. *Mar. Pollut. Bull.* **2017**, *119* (1), 12–22.
- 459 (24) Corcoran, P. L.; Biesinger, M. C.; Grifi, M. Plastics and Beaches: A Degrading Relationship. *Mar. Pollut.*  
460 *Bull.* **2009**, *58* (1), 80–84.

- 461 (25) Barnes, D. K. A.; Galgani, F.; Thompson, R. C.; Barlaz, M. Accumulation and Fragmentation of Plastic  
462 Debris in Global Environments. *Philos. Trans. R. Soc. Lond. B Biol. Sci.* **2009**, *364* (1526), 1985–1998.
- 463 (26) Singh, B.; Sharma, N. Mechanistic Implications of Plastic Degradation. *Polym. Degrad. Stab.* **2008**, *93* (3),  
464 561–584.
- 465 (27) Wilkes, R. A.; Aristilde, L. Degradation and Metabolism of Synthetic Plastics and Associated Products by  
466 *Pseudomonas* Sp.: Capabilities and Challenges. *J. Appl. Microbiol.* **2017**, *123* (3), 582–593.
- 467 (28) Romera-Castillo, C.; Pinto, M.; Langer, T. M.; Álvarez-Salgado, X. A.; Herndl, G. J. Dissolved Organic  
468 Carbon Leaching from Plastics Stimulates Microbial Activity in the Ocean. *Nat. Commun.* **2018**, *9* (1), 1430.
- 469 (29) Patin, N. V.; Pratte, Z. A.; Regensburger, M.; Hall, E.; Gilde, K.; Dove, A. D. M.; Stewart, F. J. Microbiome  
470 Dynamics in a Large Artificial Seawater Aquarium. *Appl. Environ. Microbiol.* **2018**, *84* (10).  
471 <https://doi.org/10.1128/AEM.00179-18>.
- 472 (30) Lebreton, L.; Slat, B.; Ferrari, F.; Sainte-Rose, B.; Aitken, J.; Marthouse, R.; Hajbane, S.; Cunsolo, S.;  
473 Schwarz, A.; Levivier, A.; et al. Evidence That the Great Pacific Garbage Patch Is Rapidly Accumulating Plastic. *Sci.*  
474 *Rep.* **2018**, *8* (1). <https://doi.org/10.1038/s41598-018-22939-w>.
- 475 (31) Fuhrman, J. A.; Schwabach, M. S.; Stingl, U. Proteorhodopsins: An Array of Physiological Roles? *Nat. Rev.*  
476 *Microbiol.* **2008**, *6* (6), 488–494.
- 477 (32) Sánchez, O.; Koblížek, M.; Gasol, J. M.; Ferrera, I. Effects of Grazing, Phosphorus and Light on the Growth  
478 Rates of Major Bacterioplankton Taxa in the Coastal NW Mediterranean. *Environ. Microbiol. Rep.* **2017**, *9* (3), 300–  
479 309.
- 480 (33) Fredricks, K. M. Adaptation of Bacteria from One Type of Hydrocarbon to Another. *Nature* **1966**, *209*  
481 (5027), 1047–1048.
- 482 (34) Kim, S.-J.; Kwon, K. K. Marine, Hydrocarbon-Degrading Alphaproteobacteria. In *Handbook of*  
483 *Hydrocarbon and Lipid Microbiology*; Timmis, K. N., Ed.; Springer Berlin Heidelberg: Berlin, Heidelberg, 2010; pp  
484 1707–1714.
- 485 (35) Viršek, M. K.; Lovšin, M. N.; Koren, Š.; Kržan, A.; Peterlin, M. Microplastics as a Vector for the Transport  
486 of the Bacterial Fish Pathogen Species *Aeromonas Salmonicida*. *Mar. Pollut. Bull.* **2017**, *125* (1-2), 301–309.
- 487 (36) Jin, H. M.; Kim, K. H.; Jeon, C. O. *Alteromonas Naphthalenivorans* Sp. Nov., a Polycyclic Aromatic  
488 Hydrocarbon-Degrading Bacterium Isolated from Tidal-Flat Sediment. *Int. J. Syst. Evol. Microbiol.* **2015**, *65* (11),  
489 4208–4214.

- 490 (37) Zhang, S.; Sun, C.; Xie, J.; Wei, H.; Hu, Z.; Wang, H. *Defluviimonas Pyrenivorans* Sp. Nov., a Novel  
491 Bacterium Capable of Degrading Polycyclic Aromatic Hydrocarbons. *Int. J. Syst. Evol. Microbiol.* **2018**, 68 (3), 957–  
492 961.
- 493 (38) Pan, X.-C.; Geng, S.; Lv, X.-L.; Mei, R.; Jiangyang, J.-H.; Wang, Y.-N.; Xu, L.; Liu, X.-Y.; Tang, Y.-Q.;  
494 Wang, G.-J.; et al. *Defluviimonas Alba* Sp. Nov., Isolated from an Oilfield. *Int. J. Syst. Evol. Microbiol.* **2015**, 65 (Pt  
495 6), 1805–1811.
- 496 (39) Lai, Q.; Yuan, J.; Wang, B.; Sun, F.; Qiao, N.; Zheng, T.; Shao, Z. *Bowmanella Pacifica* Sp. Nov., Isolated  
497 from a Pyrene-Degrading Consortium. *Int. J. Syst. Evol. Microbiol.* **2009**, 59 (Pt 7), 1579–1582.
- 498 (40) Chen, Q.; Reisser, J.; Cunsolo, S.; Kwadijk, C.; Kotterman, M.; Proietti, M.; Slat, B.; Ferrari, F. F.; Schwarz,  
499 A.; Levivier, A.; et al. Pollutants in Plastics within the North Pacific Subtropical Gyre. *Environ. Sci. Technol.* **2018**,  
500 52 (2), 446–456.
- 501 (41) Oberbeckmann, S.; Loeder, M. G. J.; Gerdts, G.; Osborn, A. M. Spatial and Seasonal Variation in Diversity  
502 and Structure of Microbial Biofilms on Marine Plastics in Northern European Waters. *FEMS Microbiol. Ecol.* **2014**,  
503 90 (2), 478–492.
- 504 (42) Choi, H.-M.; Kwon, H.-J.; Moreau, J. P. Cotton Nonwovens as Oil Spill Cleanup Sorbents. *Text. Res. J.*  
505 **1993**, 63 (4), 211–218.
- 506 (43) Singh, V.; Kendall, R. J.; Hake, K.; Ramkumar, S. Crude Oil Sorption by Raw Cotton. *Ind. Eng. Chem. Res.*  
507 **2013**, 52 (18), 6277–6281.
- 508 (44) Barbato, M.; Scoma, A.; Mapelli, F.; De Smet, R.; Banat, I. M.; Daffonchio, D.; Boon, N.; Borin, S.  
509 Hydrocarbonoclastic *Alcanivorax* Isolates Exhibit Different Physiological and Expression Responses to N-Dodecane.  
510 *Front. Microbiol.* **2016**, 7, 2056.

511

512

## Graphical Abstract

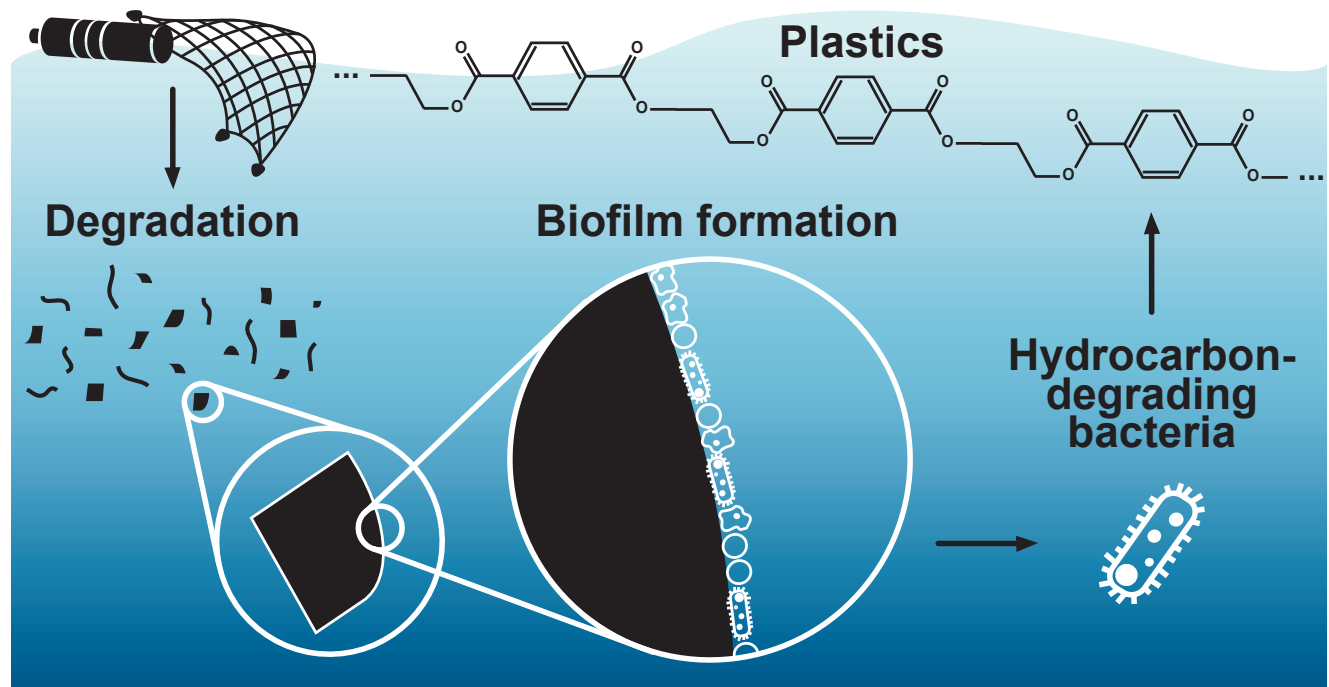

513

514
